# Supplementary material for: Mid-Holocene Climate Record in Santovka Travertine (Slovakia) and regional Biases of Climate Shifts 8.2 and 7.4 ka BP
Source: Copernicus journal article supplement (doi:10.5194/egusphere-2023-118), 2023-03-07
Supplement: Supplementary file 1 [file egusphere-2023-118-supplement.pdf]

Table S1: Results of micromorphological analysis. The classification is as follows: P – present, VF – very few (<5 %), FE – few (5– 15%), C – common (15– 30 %), FR – frequent (30– 50%), D – dominant (50–70%), VD – very dominant (> 70% of the visible area)

| Thin section | Lithostratigraphic unit          | Depth (cm) | Microstructure  | Voids                           | Groundmass            |                                | Mineral composition                    | Organic matter |              |                         | Inorganic residues of biologic origin |          |       |                     |            | Anthropogenic elements |          |     |       | Pedo-features |                      |
|--------------|----------------------------------|------------|-----------------|---------------------------------|-----------------------|--------------------------------|----------------------------------------|----------------|--------------|-------------------------|---------------------------------------|----------|-------|---------------------|------------|------------------------|----------|-----|-------|---------------|----------------------|
|              |                                  |            |                 |                                 | Nature (PPL)          | B-fabric (XPL)                 | Mineral grains and rock fragments      | Fresh roots    | Plant tissue | Fine organic components | Diatoms                               | Bivalvia | Rafts | Shells/ malacofauna | Phytoliths | Charcoal               | Ceramics | Ash | Bones | Nodules       | Excremental features |
| 1            | 3                                | 146–149    | Massif/ Channel | Channels Vughs Planes           | Brownish grey         | Crystallitic                   | -                                      | -              | C            | FR                      | C                                     | FR       | FR    | FE                  | -          | P                      | -        | -   | P     | -             | -                    |
|              | 4 black upper laminae 0.5–0.8 cm | 149–152    | Platy/ Crack    | Planes Channels                 | Dark brown            | Undifferentiated               | -                                      | -              | P            | VD                      | P                                     | -        | -     | C                   | -          | -                      | -        | -   | -     | Ca - P        | -                    |
|              | 4 calcareous laminae             |            | Platy           | Planes Channels                 | Greyish brown         | Crystallitic/ Undifferentiated | -                                      | -              | P            | FR                      | FR                                    | FE       | -     | C                   | -          | -                      | -        | -   | -     | -             | -                    |
|              | 4 organic laminae                |            | Platy           | Planes Channel                  | Dark brown            | Undifferentiated               | -                                      | -              | P            | VD                      | FR                                    | FE       | -     | C                   | -          | -                      | -        | -   | -     | Ca - C        | -                    |
|              | 5a                               | 152–155    | Platy           | Planes, Channels Vughs Vesicles | Grey to brownish grey | Crystallitic                   | -                                      | -              | C            | C                       | FR                                    | P        | -     | FE                  | -          | -                      | -        | -   | P     | -             | F                    |
| 2            | 5a                               | 156–164    | Platy           | Planes Channels Vughs           | Grey to brownish grey | Crystallitic                   | -                                      | -              | C            | C                       | FR                                    | P        | -     | FE                  | P          | P                      | -        | -   | P     | -             | F                    |
| 3            | 6b                               | 220        | Massif          | Planes                          | Pale brown to brown   | Striated/ Crystallitic         | Quartz, micas, fragments of travertine | -              | FE           | FR                      | -                                     | -        | -     | VF                  | -          | P                      | -        | -   | P     | Fe - P        | -                    |
| 4            | 6b                               | 245        | Massif          | Planes                          | Pale brown to brown   | Striated/ Crystallitic         | Quartz, micas, fragments of travertine | -              | FE           | FR                      | -                                     | -        | -     | VF                  | -          | P                      | -        | -   | -     | -             | -                    |
| 5            | 6b                               | 265        | Massif          | Planes                          | Pale brown to brown   | Striated/ Crystallitic         | Quartz, micas, fragments of travertine | -              | FE           | FR                      | -                                     | -        | -     | VF                  | -          | P                      | -        | -   | VF    | Fe - P        | -                    |
